# Supplementary material for: CXCL10-based gene cluster model serves as a potential diagnostic biomarker for premature ovarian failure
Source: PubMed Central journal article supplement (PMC10725173; doi:10.7717/peerj.16659), 2023-12-13
Supplement: peerj-11-16659-s003.pdf [file peerj-11-16659-s003.pdf]

| ITEM TO CHECK                                                        | IMPORTANCE | CHECKLIST          |
|----------------------------------------------------------------------|------------|--------------------|
| <b>EXPERIMENTAL DESIGN</b>                                           |            |                    |
| Definition of experimental and control groups                        | E          | Line 93-222        |
| Number within each group                                             | E          | Line 93-222        |
| Assay carried out by core lab or investigator's lab?                 | D          | N                  |
| Acknowledgement of authors' contributions                            | D          | N                  |
| <b>SAMPLE</b>                                                        |            |                    |
| Description                                                          | E          | Line96-98, 146-155 |
| Volume/mass of sample processed                                      | D          | N                  |
| Microdissection or macrodissection                                   | E          | Line96-98, 146-155 |
| Processing procedure                                                 | E          | Line96-98, 146-155 |
| If frozen - how and how quickly?                                     | E          | Line96-98, 146-155 |
| If fixed - with what, how quickly?                                   | E          | Line96-98, 146-155 |
| Sample storage conditions and duration (especially for FFPE samples) | E          | Line96-98, 146-155 |
| <b>NUCLEIC ACID EXTRACTION</b>                                       |            |                    |
| Procedure and/or instrumentation                                     | E          | Line 159-166       |
| Name of kit and details of any modifications                         | E          | Line 159-166       |
| Source of additional reagents used                                   | D          | N                  |
| Details of DNase or RNase treatment                                  | E          | Line 160-161       |
| Contamination assessment (DNA or RNA)                                | E          | Line 161-162       |
| Nucleic acid quantification                                          | E          | Line 162-163       |
| Instrument and method                                                | E          | Line 162-164       |
| Purity (A260/A280)                                                   | D          | Line 163           |
| Yield                                                                | D          | N                  |
| RNA integrity method/instrument                                      | E          | Line 163-164       |
| RIN/RQI or Cq of 3' and 5' transcripts                               | E          | Line 164           |
| Electrophoresis traces                                               | D          | N                  |
| Inhibition testing (Cq dilutions, spike or other)                    | E          | Line 165-166       |
| <b>REVERSE TRANSCRIPTION</b>                                         |            |                    |
| Complete reaction conditions                                         | E          | Line 166-172       |
| Amount of RNA and reaction volume                                    | E          | Line 166           |
| Priming oligonucleotide (if using GSP) and concentration             | E          | Line167            |
| Reverse transcriptase and concentration                              | E          | Line 169           |
| Temperature and time                                                 | E          | Line 166-172       |
| Manufacturer of reagents and catalogue numbers                       | D          | Line 166-172       |
| Cqs with and without RT                                              | D*         | N                  |
| Storage conditions of cDNA                                           | D          | N                  |
| <b>qPCR TARGET INFORMATION</b>                                       |            |                    |
| If multiplex, efficiency and LOD of each assay.                      | E          | Line 181           |
| Sequence accession number                                            | E          | Line182-183        |
| Location of amplicon                                                 | D          | N                  |
| Amplicon length                                                      | E          | Line187            |
| <i>In silico</i> specificity screen (BLAST, etc)                     | E          | Line 188           |
| Pseudogenes, retropseudogenes or other homologs?                     | D          | N                  |
| Sequence alignment                                                   | D          | Line 188           |
| Secondary structure analysis of amplicon                             | D          | N                  |
| Location of each primer by exon or intron (if applicable)            | E          | Line 187           |
| What splice variants are targeted?                                   | E          | Line 182-183       |
| <b>qPCR OLIGONUCLEOTIDES</b>                                         |            |                    |
| Primer sequences                                                     | E          | Line 185-186       |
| RTPrimerDB Identification Number                                     | D          | N                  |
| Probe sequences                                                      | D**        | N                  |
| Location and identity of any modifications                           | E          | Line 187           |
| Manufacturer of oligonucleotides                                     | D          | N                  |
| Purification method                                                  | D          | N                  |
| <b>qPCR PROTOCOL</b>                                                 |            |                    |
| Complete reaction conditions                                         | E          | Line172-184        |
| Reaction volume and amount of cDNA/DNA                               | E          | Line173            |
| Primer, (probe), Mg <sup>++</sup> and dNTP concentrations            | E          | Line 174-175       |
| Polymerase identity and concentration                                | E          | Line 175           |
| Buffer/kit identity and manufacturer                                 | E          | Line174            |
| Exact chemical constitution of the buffer                            | D          | N                  |
| Additives (SYBR Green I, DMSO, etc.)                                 | E          | Line 174           |
| Manufacturer of plates/tubes and catalog number                      | D          | N                  |
| Complete thermocycling parameters                                    | E          | Line176            |
| Reaction setup (manual/robotic)                                      | D          | Line175-177        |
| Manufacturer of qPCR instrument                                      | E          | Line 172-173       |
| <b>qPCR VALIDATION</b>                                               |            |                    |
| Evidence of optimisation (from gradients)                            | D          | N                  |
| Specificity (gel, sequence, melt, or digest)                         | E          | Line 188-189       |
| For SYBR Green I, Cq of the NTC                                      | E          | Line 189-190       |
| Standard curves with slope and y-intercept                           | E          | Line 178-179       |
| PCR efficiency calculated from slope                                 | E          | Line 177-181       |

|                                                          |   |              |
|----------------------------------------------------------|---|--------------|
| Confidence interval for PCR efficiency or standard error | D | Line 181     |
| r2 of standard curve                                     | E | Line 179     |
| Linear dynamic range                                     | E | Line 179     |
| Cq variation at lower limit                              | E | Line 179     |
| Confidence intervals throughout range                    | D | Line 181     |
| Evidence for limit of detection                          | E | Line179-181  |
| If multiplex, efficiency and LOD of each assay.          | E | Line 181     |
| <b>DATA ANALYSIS</b>                                     |   |              |
| qPCR analysis program (source, version)                  | E | Line183-184  |
| Cq method determination                                  | E | Line181-182  |
| Outlier identification and disposition                   | E | Line190-191  |
| Results of NTCs                                          | E | Line 190     |
| Justification of number and choice of reference genes    | E | Line 184     |
| Description of normalisation method                      | E | Line181-183  |
| Number and concordance of biological replicates          | D | N            |
| Number and stage (RT or qPCR) of technical replicates    | E | Line 192-193 |
| Repeatability (intra-assay variation)                    | E | Line 190-193 |
| Reproducibility (inter-assay variation, %CV)             | D | N            |
| Power analysis                                           | D | N            |
| Statistical methods for result significance              | E | Line 221-222 |
| Software (source, version)                               | E | Line 216     |
| Cq or raw data submission using RDML                     | D | N            |

**Table 1.** MIQE checklist for authors, reviewers and editors. All essential information (E) must be submitted with the manuscript. Desirable information (D) should be submitted if available. If using primers obtained from RTPrimerDB, information on qPCR target, oligonucleotides, protocols and validation is available from that source.

\*: Assessing the absence of DNA using a no RT assay is essential when first extracting RNA. Once the sample has been validated as RDNA-free, inclusion of a no-RT control is desirable, but no longer essential.

\*\* : Disclosure of the probe sequence is highly desirable and strongly encouraged. However, since not all commercial pre-designed assay vendors provide this information, it cannot be an essential requirement. Use of such assays is advised against.
